# Supplementary material for: Effects of Contextual Variables on Match Load in a Professional Soccer Team Attending to the Different Season Periods
Source: MDPI journal article supplement (doi:10.3390/s24020679), 2024-01-21
Supplement: s1 [file s1]

**Questionnaire S1.** Questionnaire to quantify the Mental Load in Team Sports (QMLST )

|                   | 0                      | 1               | 2    | 3        | 4             | 5    | 6 | 7         | 8 | 9 | 10                             |
|-------------------|------------------------|-----------------|------|----------|---------------|------|---|-----------|---|---|--------------------------------|
| RPE               | Rest                   | Very, very easy | Easy | Moderate | Somewhat hard | Hard |   | Very hard |   |   | Maximal                        |
| COGNITIVE<br>LOAD | No effort<br>perceived |                 |      |          |               |      |   |           |   |   | Maximun<br>effort<br>perceived |
| AFFECTIVE<br>LOAD | No effort<br>perceived |                 |      |          |               |      |   |           |   |   | Maximun<br>effort<br>perceived |
| EMOTIONAL<br>LOAD | No effort<br>perceived |                 |      |          |               |      |   |           |   |   | Maximun<br>effort<br>perceived |
